# Supplementary material for: Effects of Multicomponent Exercise on Cognitive Function in Elderly Korean Individuals
Source: PubMed Central journal article supplement — J Clin Neurol. 2020 Sep 9;16(4):612–23. doi: 10.3988/jcn.2020.16.4.612 (PMC7541979; doi:10.3988/jcn.2020.16.4.612), 2020-09-09
Supplement: jcn-16-612-s003.pdf [file jcn-16-612-s003.pdf]

# SUPPLEMENTARY MATERIAL 3

## Self-assessment sheet

### 올리운동 자가평가표



**경로당** \_\_\_\_\_

**이름** \_\_\_\_\_

**나이** \_\_\_\_\_

**단계** 1단계

신체기능에 따른 단계 선택





### 운동시 주의사항 및 자주하는 질문



**주의사항**

- ❶ 운동 전후에 스트레칭 같은 준비운동과 정리운동을 반드시 한다.
- ❷ 운동량과 강도를 서서히 늘린다.
- ❸ 운동을 시작하는 초기에 가슴통증 같은 이상은 생기면 미리 의사의 진료를 받는다.

**자주하는 질문**

- ❶ 평소와 비활동적인 노인은 운동을 어떻게 해야 하나요?  
지금부터라도 운동을 시작하면 됩니다. 대신 욕심내지 말고 운동량을 서서히 증가시켜야 합니다.
- ❷ 평소와 활동적인 노인도 운동을 더 해야 하나요?  
이미 활동적인 분들도 운동을 하게 되면 추가적이고 더 큰 건강상 이익을 얻을 수 있으므로 운동 횟수를 조금 더 늘려 나가는 것이 도움이 됩니다.
- ❸ 만성질환을 가진 노인은 운동을 어떻게 해야 하나요?  
만성질환을 가진 분들은 자신의 능력에 알맞은 목표를 세워야 합니다. 따라서 의료진과 운동 목표에 대해 먼저 상담해 보시기를 권합니다.
- ❹ 기능제한을 가진 노인은 운동을 어떻게 해야 하나요?  
의료진과 상담 후 먼저 운동 능력을 평가 받아야 합니다. 낮은 강도로 시작하여 운동량을 서서히 증가시켜 자신의 상황에 맞게 없거나 누워서 운동해야 합니다.
- ❺ 질병이나 부상 이후에는 운동을 어떻게 해야 하나요?  
특히나 근육 부상처럼 질병이나 부상이 있을 때는 일단 운동을 중단해야 하며 이후 다시 시작할 때는 이전 운동 수준에 도달할 때까지는 낮은 강도로 서서히 진행해야 합니다.

\* 작성 및 승인 : 보건복지부 / 대한노년회  
\* 대한노년회(회장:신승우)총회 / 서울 강서구로길 12(11, 12)

### 올리운동 소개 및 목적

**• '올리운동'이란?**  
평생을 가족과 나라를 위해 애쓰고 희생하신 어르신들... 저희에게 무한한 사랑을 내리셨기에, 이에 보답하고자 어르신들 올리는 마음을 담아 성남시노년보건센터는 '올리사랑'을 창단하게 되었습니다.

'올리사랑'은 성남시의 재정적 지원을 받아 성남시 어르신들의 완전한 치매장벽을 위해 창단한 치매관리단의 이름입니다.

이에, '올리사랑'에서 이름을 딴 성남시 지역특성에 맞는 '올리운동'을 개발하여 지역 어르신들께 교육 및 보급하고 있습니다.

'올리운동'은 어르신들 올리는 마음을 담고 있으며, 또한 'only : 어르신'을 위한 단 하나의 소중한 뇌건강 지킴이라는 의미를 갖고 있습니다.

**• 올리(only)운동의 목적**  
지역 특성에 맞게 개발된 치매운동요법을 치매네트워킹기관 및 관내 기관에 보급하고 지속적으로 운동을 실시하여 성남시 노인의 치매예방을 도모하고 관리한다.



### 운동의 효과 및 운동방법

**노인에서 운동의 효과**

- ❶ 조기 사망 감소
- ❷ 근골격 건강 증진
- ❸ 심혈관 질환 감소
- ❹ 생활 기능 향상
- ❺ 대사 질환 감소
- ❻ 알 발생 감소
- ❼ 건강 체중 유지
- ❽ 정신건강 증진

**노인에서 지칭한 운동방법**

01

**유산소 운동**

하루에 30-60분씩 주당 5일 이상 실천하거나, 주당 총 150분 이상의 중강도 운동 또는 하루에 20-80분씩 주당 3일 이상 하는 것, 주당 총 75분 이상의 고강도 또는 중강도 운동과 고강도를 조합하여 실천할 것을 권장 합니다.

02

**근력강화 운동**

각 주요 근육(다리, 엉덩이, 팔, 가슴, 허리, 어깨, 팔 근육)마다 주당 2-3일 근력 강화 운동을 해야 합니다. 매우 낮은 강도-저강도, 10-20회 반복으로 시작해서 서서히 강도를 증가 시킬 것을 권장합니다. 운동 시간이 2-3분, 각 근육마다 48시간의 휴식시간이 권장됩니다.

03

**유연성 운동**

주당 2-3일, 각 유연성 운동마다 2-4회 반복하면, 관절 운동 범위가 향상됩니다. 관절과 근육의 유연함이 느껴지는 지점에서 30-60초간 스트레칭 동작을 지속하는 것이 효과가 가장 좋습니다.

04

**균형 운동**

균형운동은 거주지일 안정적일 문제를 방지하고 수행하는 것에서부터 지지하는 물체 없이 수행할 수 있도록 까지 강도를 증가시킬 수 있습니다. 하루에 20-30분 이상, 주당 2-3일 이상, 주당 총 60분 이상의 균형 운동을 할 것을 권장합니다.

\* 작성 및 승인 : 보건복지부 / 대한노년회  
\* 대한노년회(회장:신승우)총회 / 서울 강서구로길 12(11, 12)

01  
주차

올리운동 1단계(허약체력)

• 세트 중간 10초 휴식, 다음 운동으로 전환 시 1분 휴식

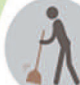

• 일상신체활동(매일)

- 1 친구 만나기 혹은 지인 만나기, 산책하기 혹은 외출하기
- 2 20분이나 한 번씩 일어나 움직이기

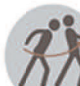

• 유산소운동(주 6회-월~토)

- 1 치마막수(손가락, 손목, 손등)이며 제자리 걷기(5분 실시)
- 2 벽 잡고 제자리 좌, 우 걷기(5분 실시)
- 3 의자에 앉아서 좌, 우 노젓기(5분 실시)

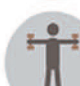

• 근력강화운동(주 3회-월, 수, 금)

- 1 누워서 무릎 세운 채 엉덩이 들기(5초 유지 5회/3번 반복)
- 2 누워서 팔다리 엇갈려 들기(5회/3번 반복)
- 3 벽 잡고 허벅지를 펴고 유지하기(5초 유지 5회/3번 반복)
- 4 벽 잡고 팔굽혀 펴기(5회/3번 반복)

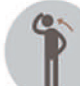

• 유연성운동(매일)

- 1 누워서 무릎 잡아당기기(좌, 우 5초 유지 5회)
- 2 다리 피 양팔꿈치 닿았다 밀기(5회/3번 반복)
- 3 양손 어깨잡고 돌리기(일, 뒤 방향 5회)
- 4 투영 율리후프(일, 뒤 방향 5회)
- 5 양 손목, 발목 돌리기(일, 뒤 방향 5회)

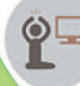

• 앉아서 하는 활동(가급적 앉아있는 시간을 줄이세요.)

TV보는 동안 머리 위로 박수치기 20번

자가평가표

올리운동 1단계(허약체력)

|         | 월 | 화 | 수 | 목 | 금 | 토 | 일 |
|---------|---|---|---|---|---|---|---|
| 일상신체 활동 |   |   |   |   |   |   |   |
| 유산소 운동  |   |   |   |   |   |   |   |
| 근력강화 운동 |   |   |   |   |   |   |   |
| 유연성 운동  |   |   |   |   |   |   |   |
| 비고      |   |   |   |   |   |   |   |

02  
주차

올리운동 1단계(허약체력)

• 세트 중간 10초 휴식, 다음 운동으로 전환 시 1분 휴식

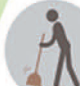

• 일상신체활동(매일)

- 1 친구 만나기 혹은 지인 만나기, 산책하기 혹은 외출하기
- 2 20분이나 한 번씩 일어나 움직이기

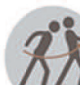

• 유산소운동(주 6회-월~토)

- 1 치마막수(손가락, 손목, 손등)이며 제자리 걷기(5분 실시)
- 2 벽 잡고 제자리 좌, 우 걷기(5분 실시)
- 3 의자에 앉아서 좌, 우 노젓기(5분 실시)

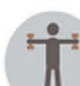

• 근력강화운동(주 3회-월, 수, 금)

- 1 누워서 무릎 세운 채 엉덩이 들기(5초 유지 5회/3번 반복)
- 2 누워서 팔다리 엇갈려 들기(5회/3번 반복)
- 3 벽 잡고 허벅지를 펴고 유지하기(5초 유지 5회/3번 반복)
- 4 벽 잡고 팔굽혀 펴기(5회/3번 반복)

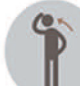

• 유연성운동(매일)

- 1 누워서 무릎 잡아당기기(좌, 우 5초 유지 5회)
- 2 다리 피 양팔꿈치 닿았다 밀기(5회/3번 반복)
- 3 양손 어깨잡고 돌리기(일, 뒤 방향 5회)
- 4 투영 율리후프(일, 뒤 방향 5회)
- 5 양 손목, 발목 돌리기(일, 뒤 방향 5회)

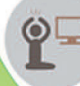

• 앉아서 하는 활동(가급적 앉아있는 시간을 줄이세요.)

TV보는 동안 머리 위로 박수치기 20번

자가평가표

올리운동 1단계(허약체력)

|         | 월 | 화 | 수 | 목 | 금 | 토 | 일 |
|---------|---|---|---|---|---|---|---|
| 일상신체 활동 |   |   |   |   |   |   |   |
| 유산소 운동  |   |   |   |   |   |   |   |
| 근력강화 운동 |   |   |   |   |   |   |   |
| 유연성 운동  |   |   |   |   |   |   |   |
| 비고      |   |   |   |   |   |   |   |

### 03 주차

#### 올리운동 1단계(허약체력)

• 세트 횡간 10초 휴식, 다음 운동으로 전환시 1분 휴식

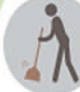

##### • 일상신체활동(매일)

- 1 친구 만나기 혹은 지인 만나기, 산책하기 혹은 외출하기
- 2 20분이나 한 번씩 일어나 움직이기

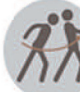

##### • 유산소운동(주 6회-월~토)

- 1 치매박수(손가락, 손목, 손등)치며 제자리 걷기(5분 실시)
- 2 벽 잡고 체자리 좌, 우 걷기(5분 실시)
- 3 의자에 앉아서 좌, 우 노젓기(5분 실시)

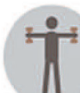

##### • 근력강화운동(주 3회-월, 수, 금)

- 1 누워서 무릎 세운 채 엉덩이 들기(5초 유지 5회/3번 반복)
- 2 누워서 팔다리 엇갈려 들기(5회/3번 반복)
- 3 벽 잡고 뒤꿈치를 들고 유지하기(5초 유지 5회/3번 반복)
- 4 벽 잡고 팔굽혀펴기(5회/3번 반복)

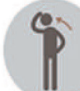

##### • 유연성운동(매일)

- 1 누워서 무릎 잡아당기기(좌, 우 5초 유지 5회)
- 2 다리 피 양방향을 당겼다 밀기(5회/3번 반복)
- 3 양손 어깨집고 돌리기(좌, 우 방향 5회)
- 4 두명 줄리후프(좌, 우 방향 5회)
- 5 양 손목, 발목 돌리기(좌, 우 방향 5회)

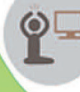

##### • 앉아서 하는 활동(가급적 앉아있는 시간을 줄이세요.)

TV보는 동안 머리 위로 박수치기 20번

### 자가평가표

올리운동 1단계(허약체력)

|         | 월 | 화 | 수 | 목 | 금 | 토 | 일 |
|---------|---|---|---|---|---|---|---|
| 일상신체 활동 |   |   |   |   |   |   |   |
| 유산소 운동  |   |   |   |   |   |   |   |
| 근력강화 운동 |   |   |   |   |   |   |   |
| 유연성 운동  |   |   |   |   |   |   |   |
| 비고      |   |   |   |   |   |   |   |

### 04 주차

#### 올리운동 1단계(허약체력)

• 세트 횡간 10초 휴식, 다음 운동으로 전환시 1분 휴식

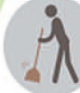

##### • 일상신체활동(매일)

- 1 친구 만나기 혹은 지인 만나기, 산책하기 혹은 외출하기
- 2 20분이나 한 번씩 일어나 움직이기

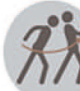

##### • 유산소운동(주 6회-월~토)

- 1 치매박수(손가락, 손목, 손등)치며 제자리 걷기(5분 실시)
- 2 벽 잡고 체자리 좌, 우 걷기(5분 실시)
- 3 의자에 앉아서 좌, 우 노젓기(5분 실시)

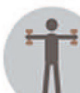

##### • 근력강화운동(주 3회-월, 수, 금)

- 1 누워서 무릎 세운 채 엉덩이 들기(5초 유지 5회/3번 반복)
- 2 누워서 팔다리 엇갈려 들기(5회/3번 반복)
- 3 벽 잡고 뒤꿈치를 들고 유지하기(5초 유지 5회/3번 반복)
- 4 벽 잡고 팔굽혀펴기(5회/3번 반복)

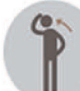

##### • 유연성운동(매일)

- 1 누워서 무릎 잡아당기기(좌, 우 5초 유지 5회)
- 2 다리 피 양방향을 당겼다 밀기(5회/3번 반복)
- 3 양손 어깨집고 돌리기(좌, 우 방향 5회)
- 4 두명 줄리후프(좌, 우 방향 5회)
- 5 양 손목, 발목 돌리기(좌, 우 방향 5회)

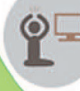

##### • 앉아서 하는 활동(가급적 앉아있는 시간을 줄이세요.)

TV보는 동안 머리 위로 박수치기 20번

### 자가평가표

올리운동 1단계(허약체력)

|         | 월 | 화 | 수 | 목 | 금 | 토 | 일 |
|---------|---|---|---|---|---|---|---|
| 일상신체 활동 |   |   |   |   |   |   |   |
| 유산소 운동  |   |   |   |   |   |   |   |
| 근력강화 운동 |   |   |   |   |   |   |   |
| 유연성 운동  |   |   |   |   |   |   |   |
| 비고      |   |   |   |   |   |   |   |

05 주차

올리운동 1단계(허약체력)

• 세트 중간 10초 휴식, 다음 운동으로 전환 시 1분 휴식

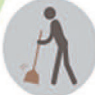

• 일상신체활동(매일)

- ① 친구 만나기 혹은 지인 만나기, 산책하기 혹은 외출하기
- ② 20분마다 한 번씩 일어나 움직이기

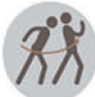

• 유산소운동(주 6회-월~토)

- ① 치아박수(손가락, 손목, 손등)하여 체자리 걷기(5분 실시)
- ② 벽 잡고 체자리 걷, 우 경기(5분 실시)
- ③ 의자에 앉아서 걷, 우 노젓기(5분 실시)

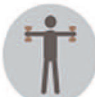

• 근력강화운동(주 3회-월, 수, 금)

- ① 누워서 무릎 세운 채 엉덩이 들기(5초 유지 5회/3번 반복)
- ② 누워서 팔다리 엇갈려 들기(5회/3번 반복)
- ③ 벽 잡고 뒤꿈치를 들고 유지하기(5초 유지 5회/3번 반복)
- ④ 벽 잡고 팔굽혀 펴기(5회/3번 반복)

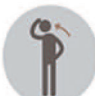

• 유연성운동(매일)

- ① 누워서 무릎 잡아당기기(좌, 우 5초 유지 5회)
- ② 다리 꼬 양팔꿈 닿았다 일기(5회/3번 반복)
- ③ 앉은 자세 잡고 풀리기(좌, 우 5회)
- ④ 튜얼 올리후프(좌, 우 5회)
- ⑤ 양 손목, 발목 돌리기(좌, 우 5회)

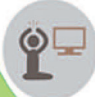

• 앉아서 하는 활동(가급적 앉아있는 시간을 줄이세요.)

TV보는 중간 머리 위로 박수치기 20번

자가평가표

올리운동 1단계(허약체력)

|         | 월 | 화 | 수 | 목 | 금 | 토 | 일 |
|---------|---|---|---|---|---|---|---|
| 일상신체 활동 |   |   |   |   |   |   |   |
| 유산소 운동  |   |   |   |   |   |   |   |
| 근력강화 운동 |   |   |   |   |   |   |   |
| 유연성 운동  |   |   |   |   |   |   |   |
| 비고      |   |   |   |   |   |   |   |

06 주차

올리운동 1단계(허약체력)

• 세트 중간 10초 휴식, 다음 운동으로 전환 시 1분 휴식

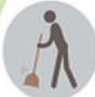

• 일상신체활동(매일)

- ① 친구 만나기 혹은 지인 만나기, 산책하기 혹은 외출하기
- ② 20분마다 한 번씩 일어나 움직이기

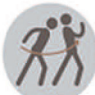

• 유산소운동(주 6회-월~토)

- ① 치아박수(손가락, 손목, 손등)하여 체자리 걷기(5분 실시)
- ② 벽 잡고 체자리 걷, 우 경기(5분 실시)
- ③ 의자에 앉아서 걷, 우 노젓기(5분 실시)

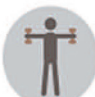

• 근력강화운동(주 3회-월, 수, 금)

- ① 누워서 무릎 세운 채 엉덩이 들기(5초 유지 5회/3번 반복)
- ② 누워서 팔다리 엇갈려 들기(5회/3번 반복)
- ③ 벽 잡고 뒤꿈치를 들고 유지하기(5초 유지 5회/3번 반복)
- ④ 벽 잡고 팔굽혀 펴기(5회/3번 반복)

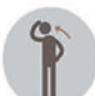

• 유연성운동(매일)

- ① 누워서 무릎 잡아당기기(좌, 우 5초 유지 5회)
- ② 다리 꼬 양팔꿈 닿았다 일기(5회/3번 반복)
- ③ 앉은 자세 잡고 풀리기(좌, 우 5회)
- ④ 튜얼 올리후프(좌, 우 5회)
- ⑤ 양 손목, 발목 돌리기(좌, 우 5회)

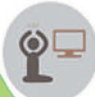

• 앉아서 하는 활동(가급적 앉아있는 시간을 줄이세요.)

TV보는 중간 머리 위로 박수치기 20번

자가평가표

올리운동 1단계(허약체력)

|         | 월 | 화 | 수 | 목 | 금 | 토 | 일 |
|---------|---|---|---|---|---|---|---|
| 일상신체 활동 |   |   |   |   |   |   |   |
| 유산소 운동  |   |   |   |   |   |   |   |
| 근력강화 운동 |   |   |   |   |   |   |   |
| 유연성 운동  |   |   |   |   |   |   |   |
| 비고      |   |   |   |   |   |   |   |
